# Supplementary material for: Effect of [Na+]/[Li+] concentration ratios in brines on lithium carbonate production through membrane electrolysis
Source: Royal Society of Chemistry journal article supplement (doi:10.1039/d3fd00051f), 2023-01-01
Supplement: d3fd00051f1.pdf [file d3fd00051f1.pdf]

# **SUPPORTING INFORMATION for**

## **EFFECT OF $[\text{Na}^+]/[\text{Li}^+]$ RATIO OF CONCENTRATIONS IN BRINES ON LITHIUM CARBONATE PRODUCTION THROUGH MEMBRANE ELECTROLYSIS**

Walter R. Torres<sup>a</sup>, Nadia C. Zeballos<sup>a,b</sup>, Victoria Flexer<sup>a,\*</sup>

<sup>a</sup> Centro de Investigación y Desarrollo en Materiales Avanzados y Almacenamiento de Energía de Jujuy-CIDMEJu (CONICET-Universidad Nacional de Jujuy). Av. Martijena S/N, Palpalá, 4612, Argentina.

<sup>b</sup> Instituto Nacional de Tecnología Industrial (INTI) Sede Jujuy. Av. Martijena S/N, Palpalá, 4612, Argentina.

\*Corresponding author:

Victoria Flexer: [vflexer@unju.edu.ar](mailto:vflexer@unju.edu.ar)

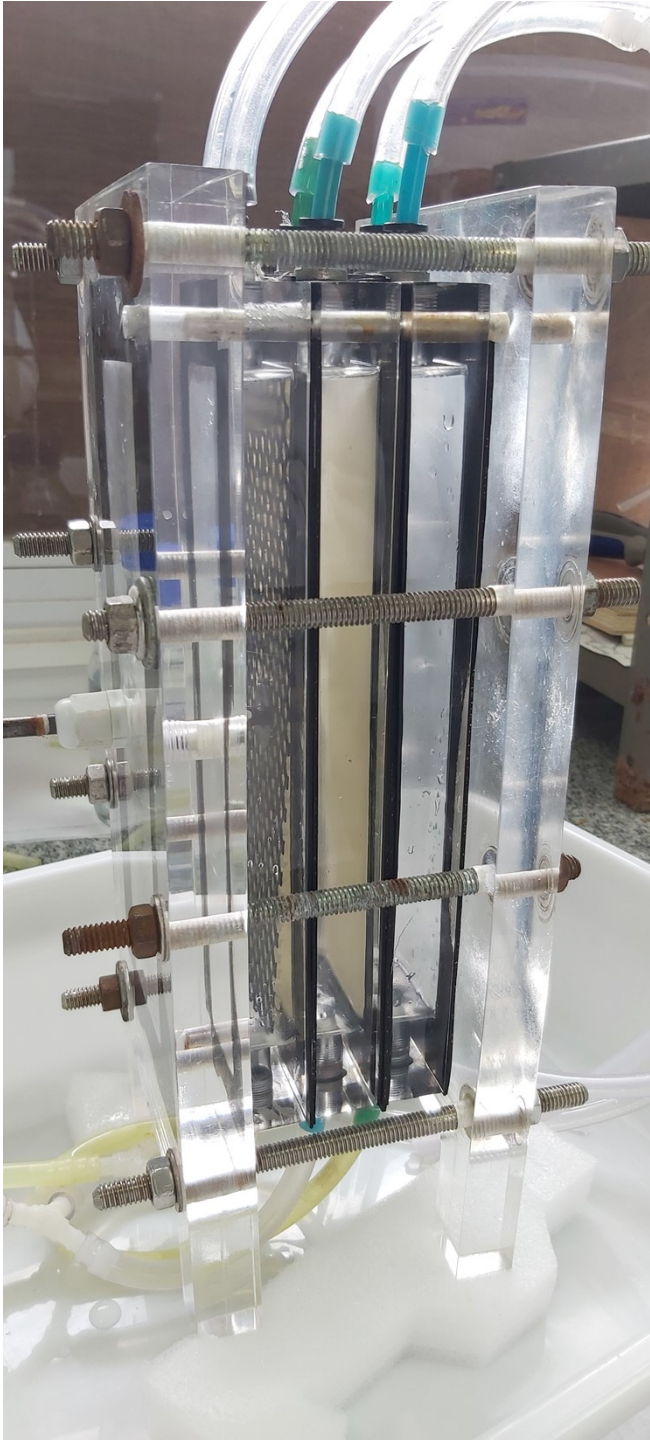

**Figure S1:** Picture of the water electrolyzer used throughout the experiments.

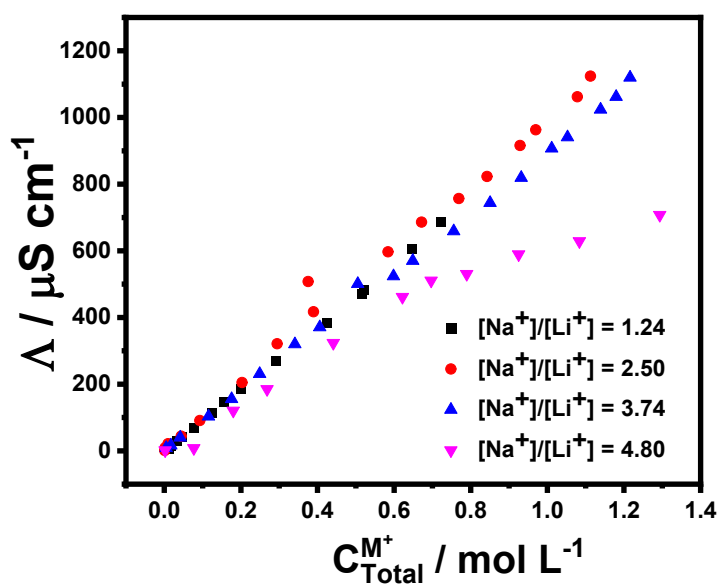

**Figure S2.** Conductivity values in the middle compartment as a function of the total ionic concentrations. All conductivity values correspond to 1:100 dilutions of the test solutions.

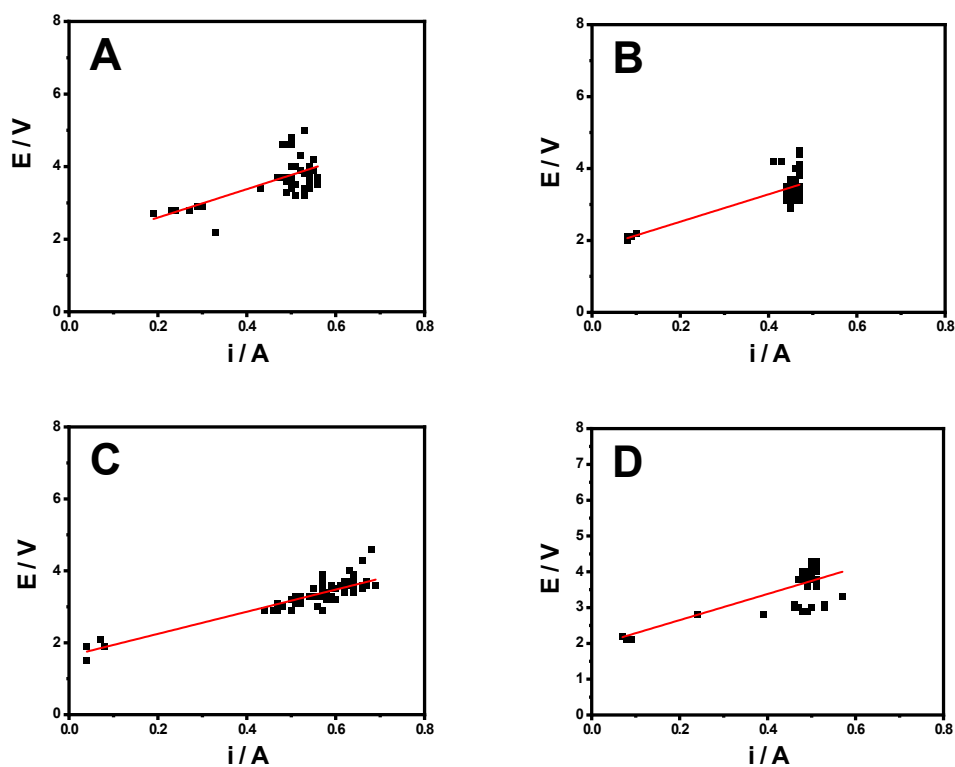

**Figure S3.** Cell potential vs. current density for the first 50% of the electrolysis. A-D correspond to increasing  $[\text{Na}^+]/[\text{Li}^+]$  ratio of concentrations.

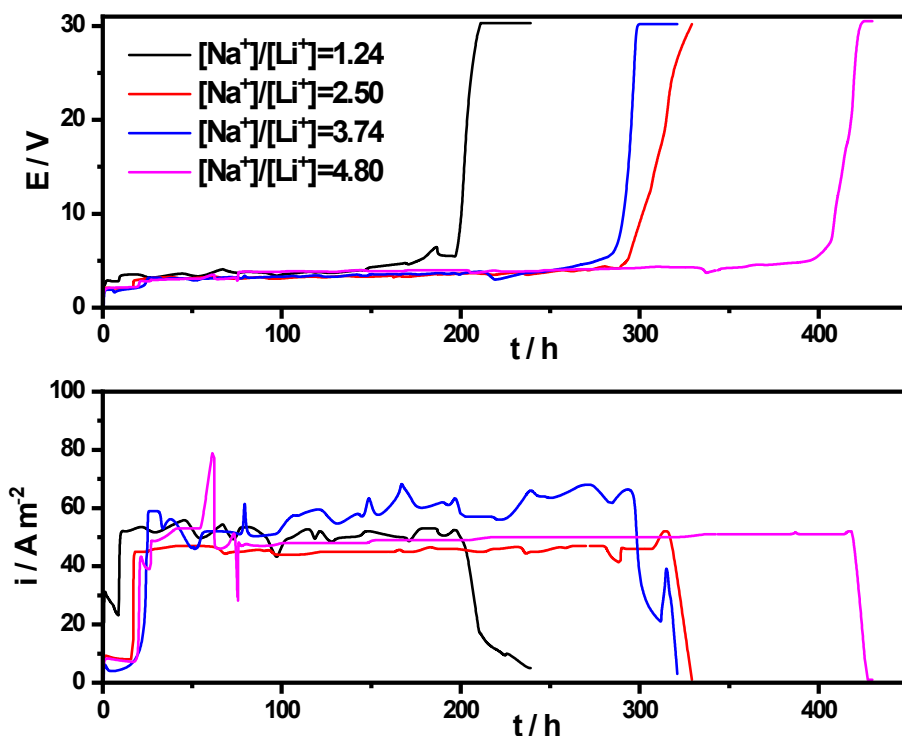

**Figure S4.** Cell voltage-time plots (top) and current-time plots (bottom), for the membrane electrolysis experiments with feed solutions with different  $[\text{Na}^+]/[\text{Li}^+]$  concentration ratios.

| $[\text{Na}^+]/[\text{Li}^+]$<br>Ratio | Cathodic compartment<br>initial | Cathodic compartment<br>final | Middle compartment<br>initial | Middle compartment<br>final | Anodic compartment<br>initial | Anodic compartment<br>final |
|----------------------------------------|---------------------------------|-------------------------------|-------------------------------|-----------------------------|-------------------------------|-----------------------------|
|                                        | $\text{g cm}^{-3}$              |                               |                               |                             |                               |                             |
| 1.24                                   | 1.00                            | 1.1862                        | 1.028                         | 0.994                       | 1.100                         | 1.100                       |
| 2.50                                   | 1.00                            | 1.1903                        | 1.036                         | 0.997                       | 1.100                         | 1.100                       |
| 3.74                                   | 1.00                            | 1.2276                        | 1.044                         | 0.986                       | 1.100                         | 1.100                       |
| 4.80                                   | 1.00                            | 1.2241                        | 1.060                         | 0.995                       | 1.100                         | 1.100                       |

**Table S1:** Density values of the original solutions and after completion of the electrolysis. These values were used to convert solution volumes to mass values.

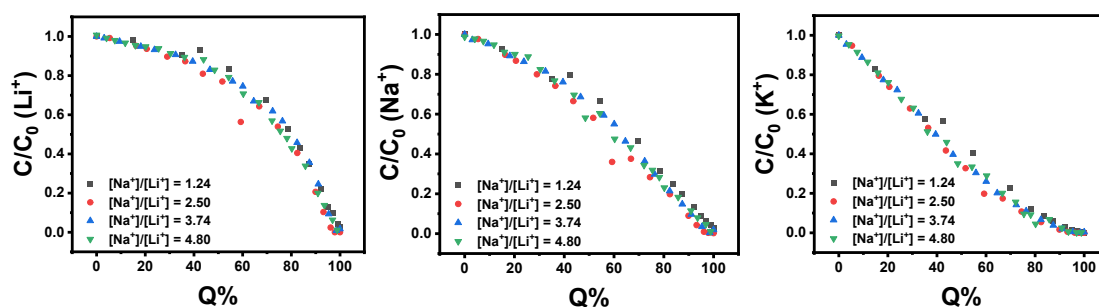

**Figure S5.** Comparison of the normalized concentrations in the middle compartment for all 4 experiments.
